# Supplementary material
Source: PubMed Central journal article supplement (PMC3515827)
Supplement: tjp0590-5401-SD1.pdf [file tjp0590-5401-SD1.pdf]

## Supplemental Data

### Size-dependent heterogeneity of contractile $\text{Ca}^{2+}$ -sensitization in rat arterial smooth muscle

Toshio Kitazawa and Kazuyo Kitazawa

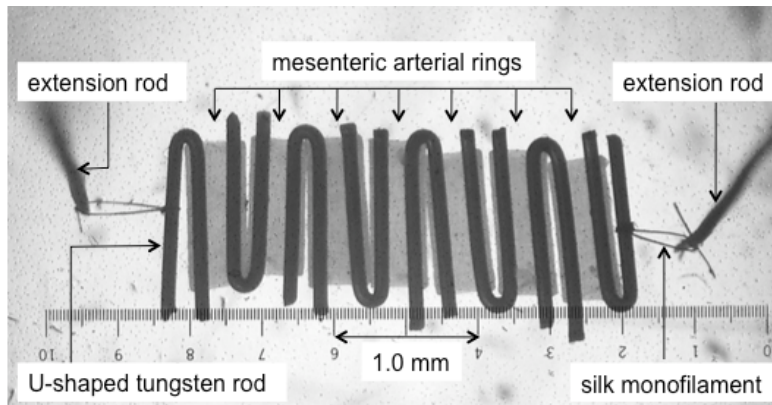

**Supplemental Fig. S1.** Representative photograph of a string of seven small mesenteric arterial tubes connected with U-shaped 0.1 mm-diameter tungsten clips for force measurement and quick-freezing. Each side of the string was hooked to a tungsten extension needle with a ring of monofilament silk thread. The arterial strings were stretched to about 1.2 mN of passive tension followed by a spontaneous decrease to a lower steady level, where the arteries produced a maximum force.

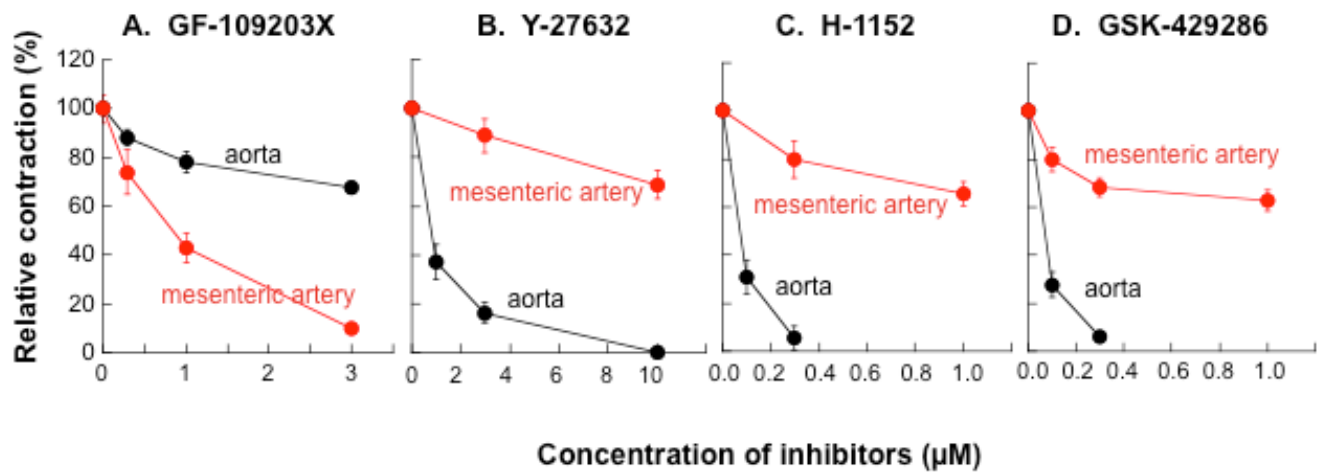

**Supplemental Fig. S2.** Relationship between concentration of inhibitors and steady-state levels of contraction in response to 30  $\mu\text{M}$  PE in small mesenteric artery and aorta.  $n=4$ .

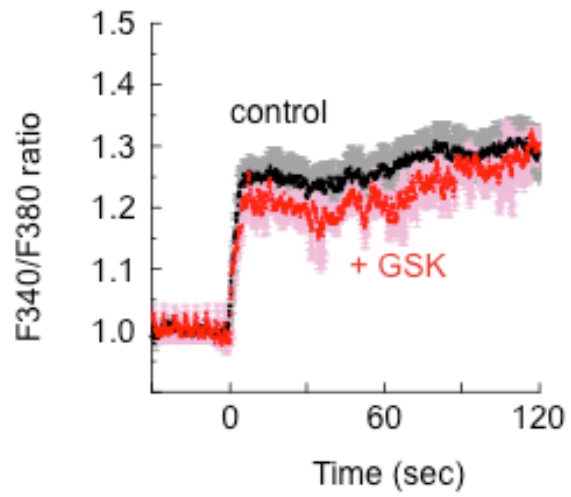

**Supplemental Fig. S3.** Effect of 1  $\mu$ M GSK-429286 on the time course of PE-induced  $\text{Ca}^{2+}$  rise in rat aorta.  $n=3$ .

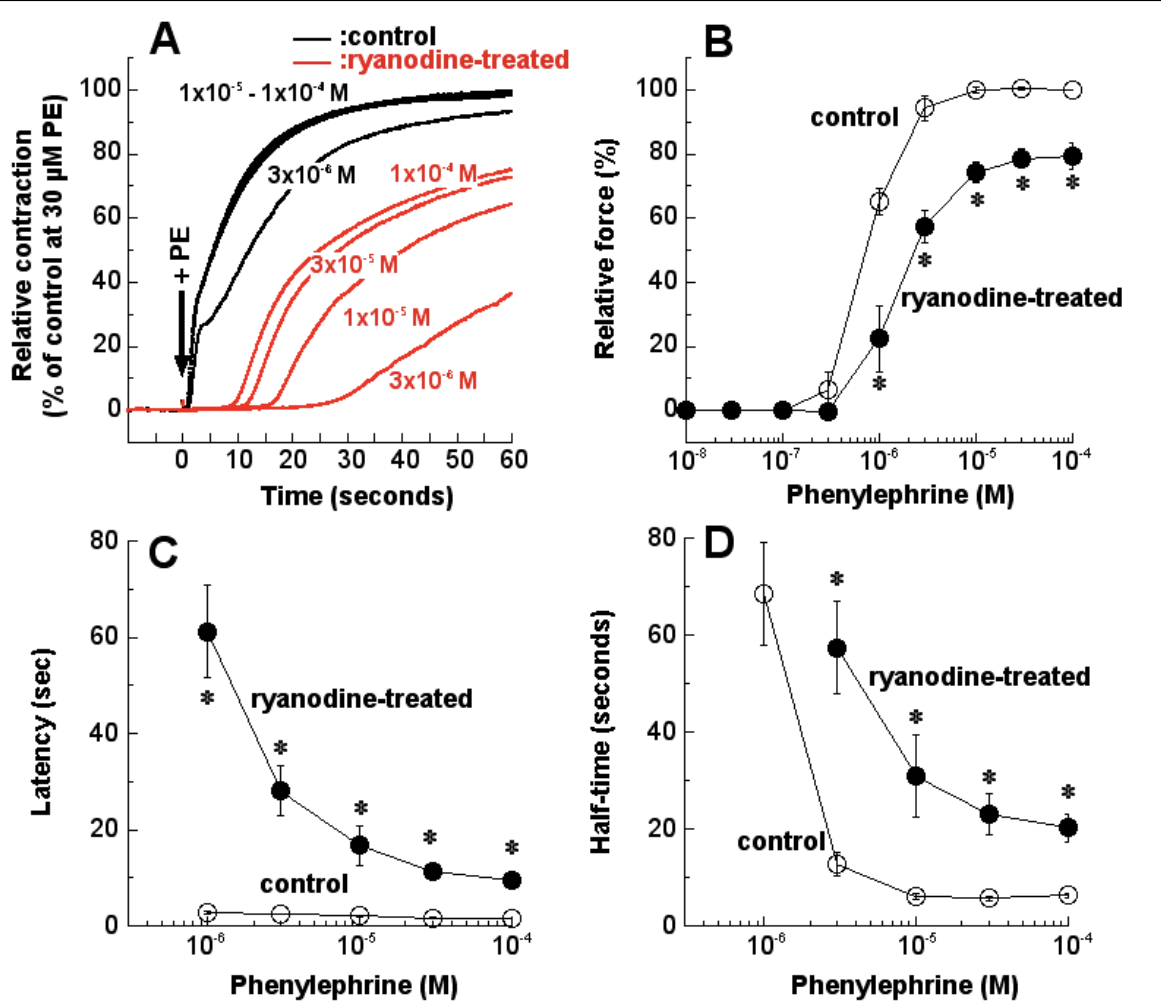

**Supplemental Fig. S4.** Effect of ryanodine pretreatment on PE-induced contraction in small mesenteric arteries. **A:** Contraction time courses in response to various PE concentrations in rat small mesenteric arteries with and without ryanodine pretreatment. **B:** effect of ryanodine pretreatment on the steady-state concentration-response relationship of PE-induced contraction in a cumulatively-increased fashion. In this series of experiments, the sustained level of contraction after the treatment was significantly lower (20%) compared to control. **C:** effect of ryanodine pretreatment on onset latency of PE-induced contraction. **D:** effect of ryanodine pretreatment on PE-induced contraction development half-time. n=4.

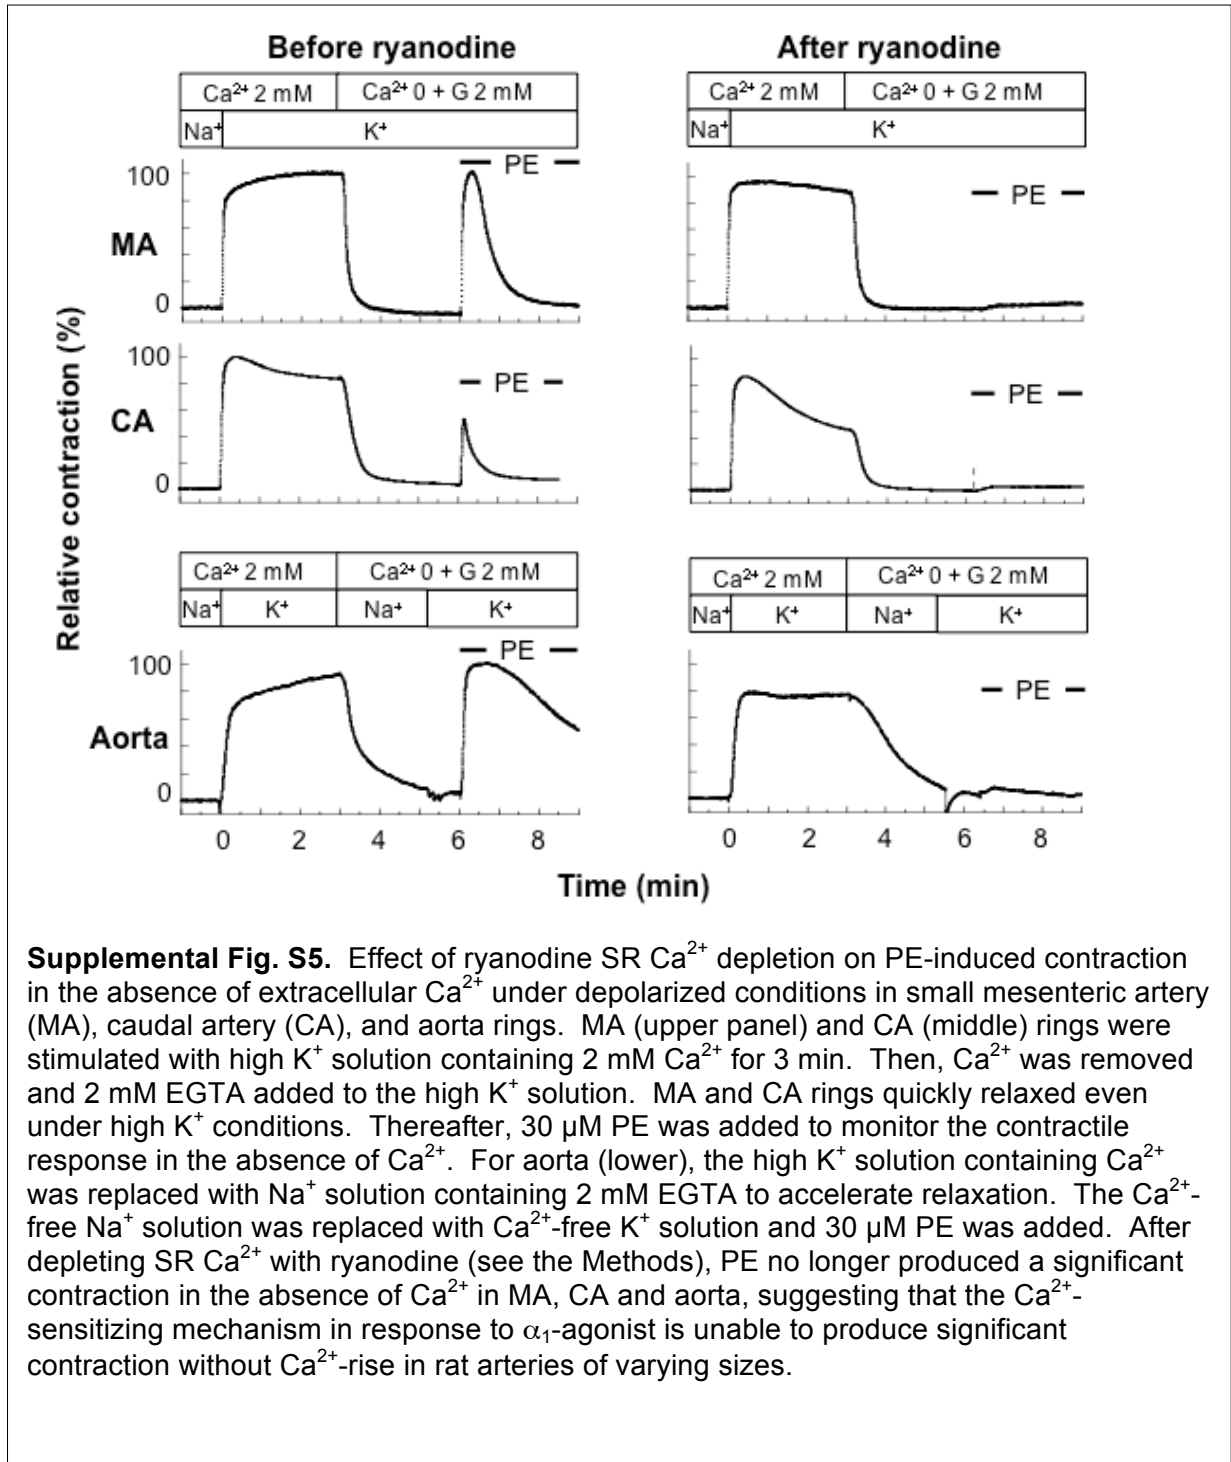

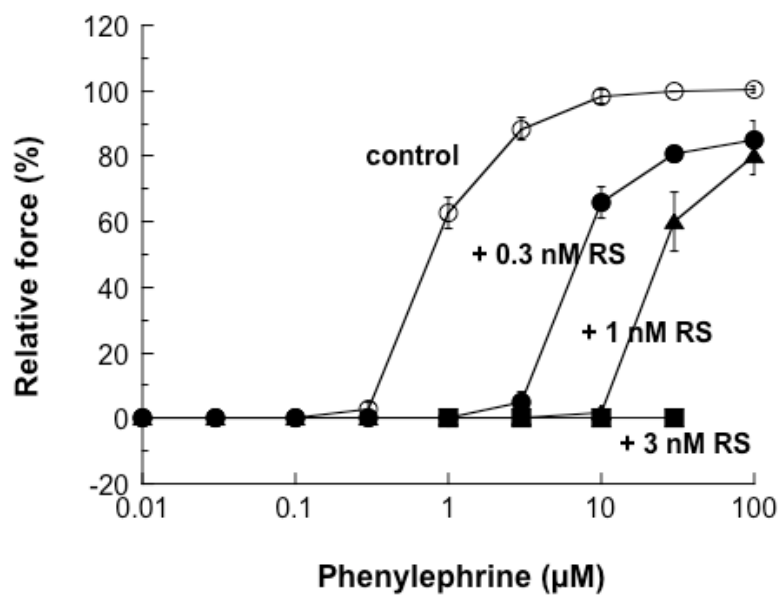

**Supplemental Fig. S6.** Effect of  $\alpha_{1A}$  subtype-selective antagonist RS-100329 on steady-state concentration-response relationship of PE-induced contraction in small mesenteric artery. PE was cumulatively added in the presence and absence of RS-100329. RS; RS-100329. n=4.

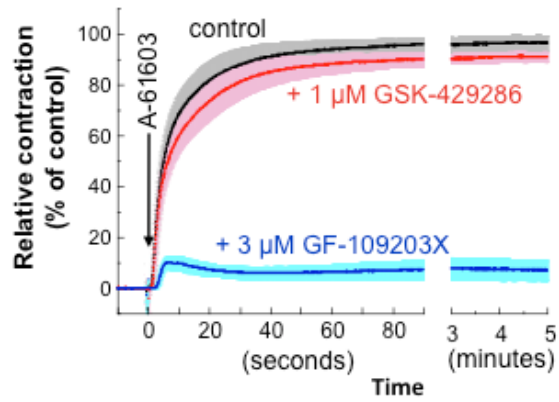

**Supplemental Fig. S7.** Effect of 1  $\mu\text{M}$  GSK-429286 or 3  $\mu\text{M}$  GF-109203X on 30 nM A-61603-induced contraction in small mesenteric artery. GSK-429286; a ROCK inhibitor, A-61603; an  $\alpha_{1A}$  subtype-specific agonist. n=3-6.

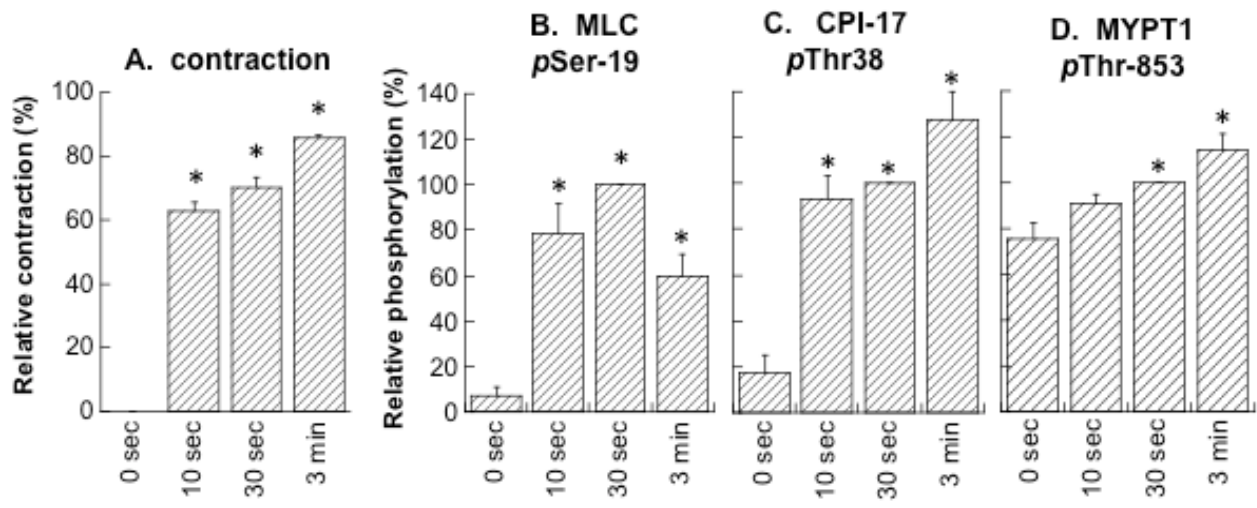

**Supplemental Fig. S8.** Time courses of phosphorylation of MLC (B), CPI-17 (C), and MYPT1 Thr853 (D) during PE-induced contraction (A) in rat aorta. The level of contraction was normalized with a maximum. The level of phosphorylation was normalized with that at 30 sec after PE stimulation. n = 3-5.
